# Supplementary material for: High-Throughput Profiling of Anti-Glycan Humoral Responses to SIV Vaccination and Challenge
Source: PubMed Central journal article supplement (PMC3781036; doi:10.1371/journal.pone.0075302), 2013-09-23
Supplement: pone.0075302.s001.pdf [file pone.0075302.s001.pdf]

## **Supplementary Materials**

**for**

### **High-throughput profiling of anti-glycan humoral responses to SIV vaccination and challenge**

**Authors:** Christopher T. Campbell<sup>1</sup>, Sean R. Llewellyn<sup>1</sup>, Thorsten Damberg<sup>2</sup>,  
Ian L. Morgan<sup>2</sup>, Marjorie Robert-Guroff<sup>2\*</sup>, Jeffrey C. Gildersleeve<sup>1\*</sup>

#### **Author Affiliations:**

1. Chemical Biology Laboratory, National Cancer Institute, National Institutes of Health, Frederick, MD 21702
2. Vaccine Branch, National Cancer Institute, National Institutes of Health, Bethesda, MD 20892

#### **\*Corresponding Authors:**

Jeffrey C. Gildersleeve  
376 Boyles Street  
Room 208  
Frederick, MD 21702  
301-846-5699  
gildersj@mail.nih.gov

Marjorie Robert-Guroff  
41 Medlars Drive MSC5065  
Building 41, Room D804  
Bethesda, MD 20892-5065  
301-496-2114  
guroffm@mail.nih.gov

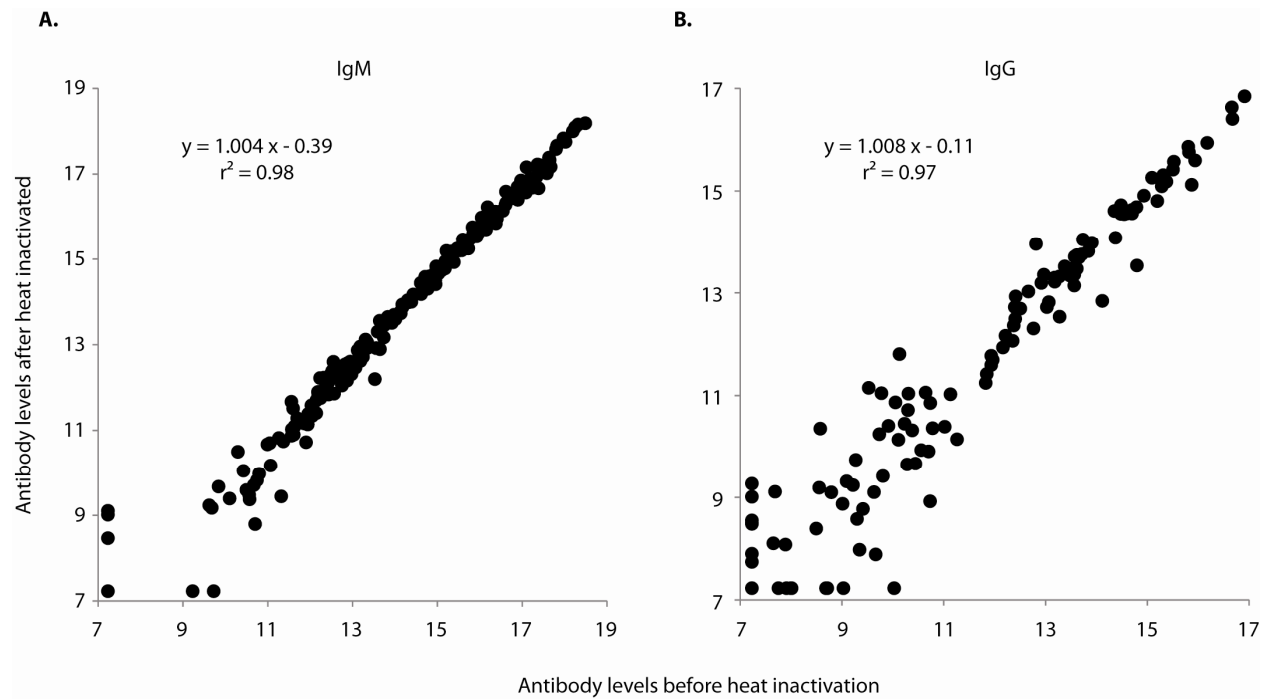

**Supplemental Fig. S1. Effect of heat treatment on anti-glycan antibody levels.** Scatterplots comparing levels of anti-glycan (A) IgM and (B) IgG antibodies before and after heat inactivation of SIV (56<sup>0</sup>C for 30 minutes).

| <b>Secondary Antibody</b>             | <b>Supplier</b>                             | <b>working concentration</b> |
|---------------------------------------|---------------------------------------------|------------------------------|
| <b>TRITC Goat anti-monkey<br/>IgM</b> | Brookwood Biomedical<br>(Catalog # SAB1157) | 2 µg/mL                      |
| <b>TRITC Goat anti-monkey<br/>IgG</b> | Brookwood Biomedical<br>(Catalog # SAB1307) | 2 µg/mL                      |

**Supplemental Table S1. Secondary antibodies for detection of IgM and IgG**

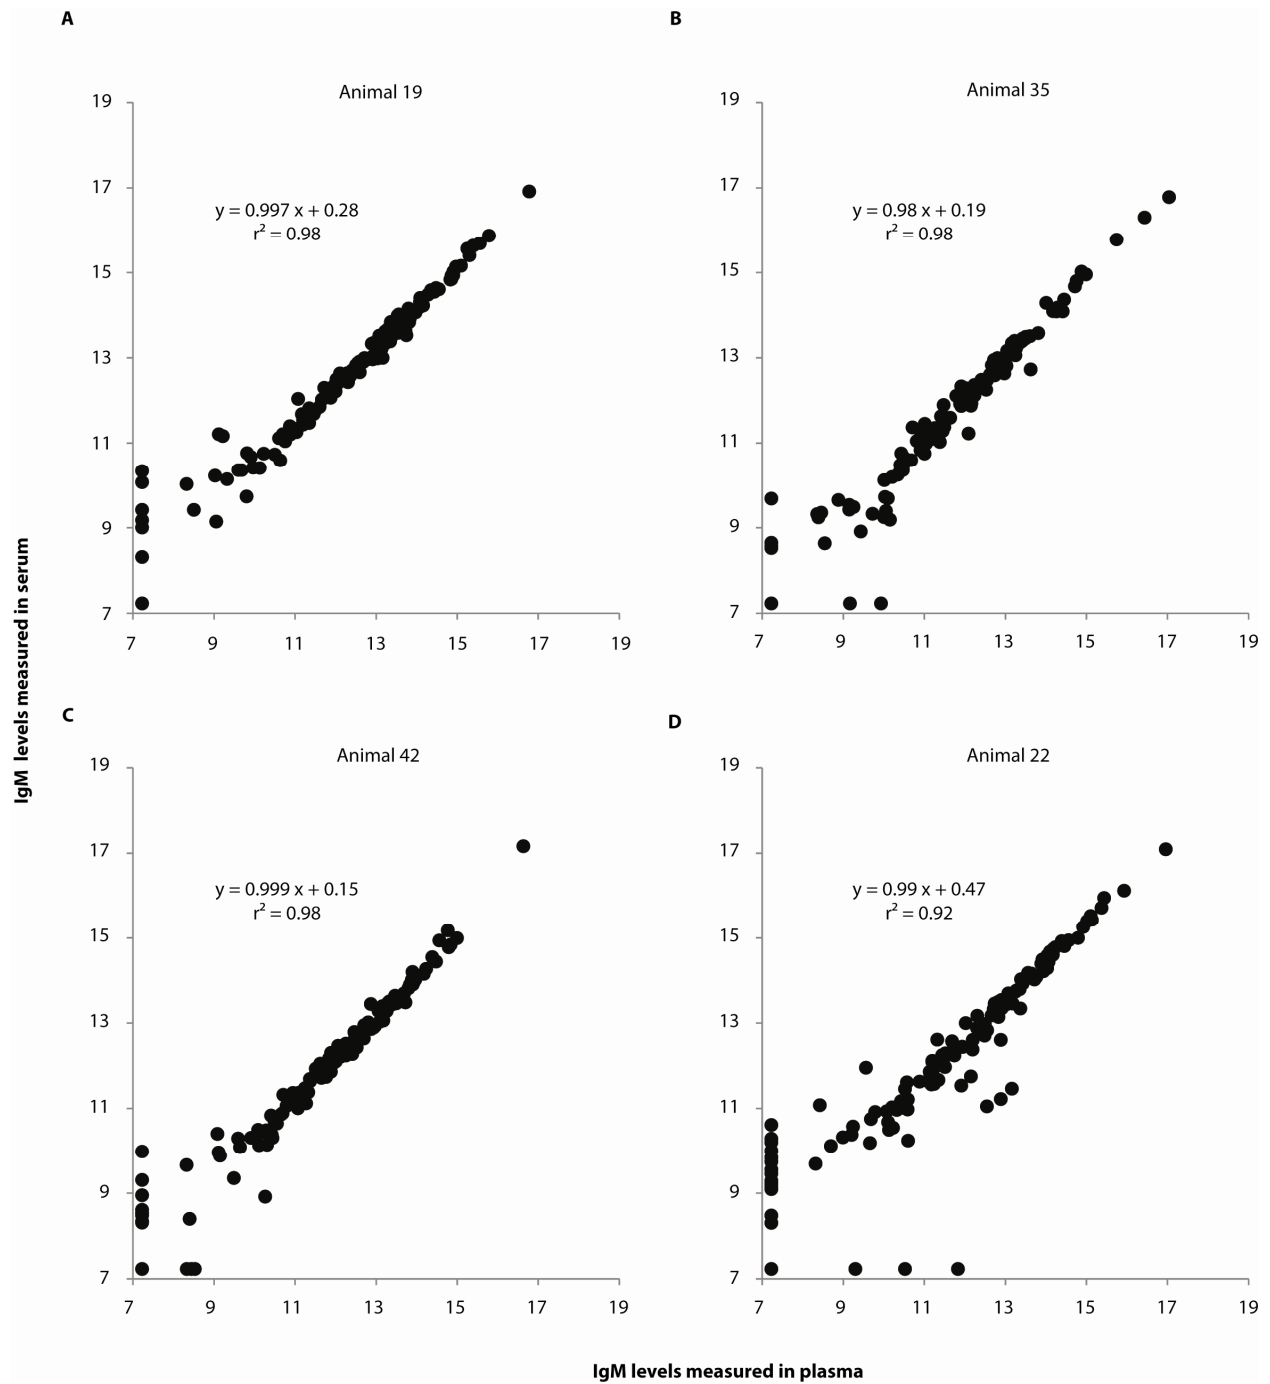

**Supplemental Figure S2. Levels of circulating anti-glycan IgM measured in plasma and serum.** Serum and plasma samples were obtained simultaneously from 4 macaques (A-D). For each animal, scatterplots compare the levels of IgM bound to each array component measured in plasma (x-axis) with the corresponding levels of IgM antibody measured in serum (y-axis).

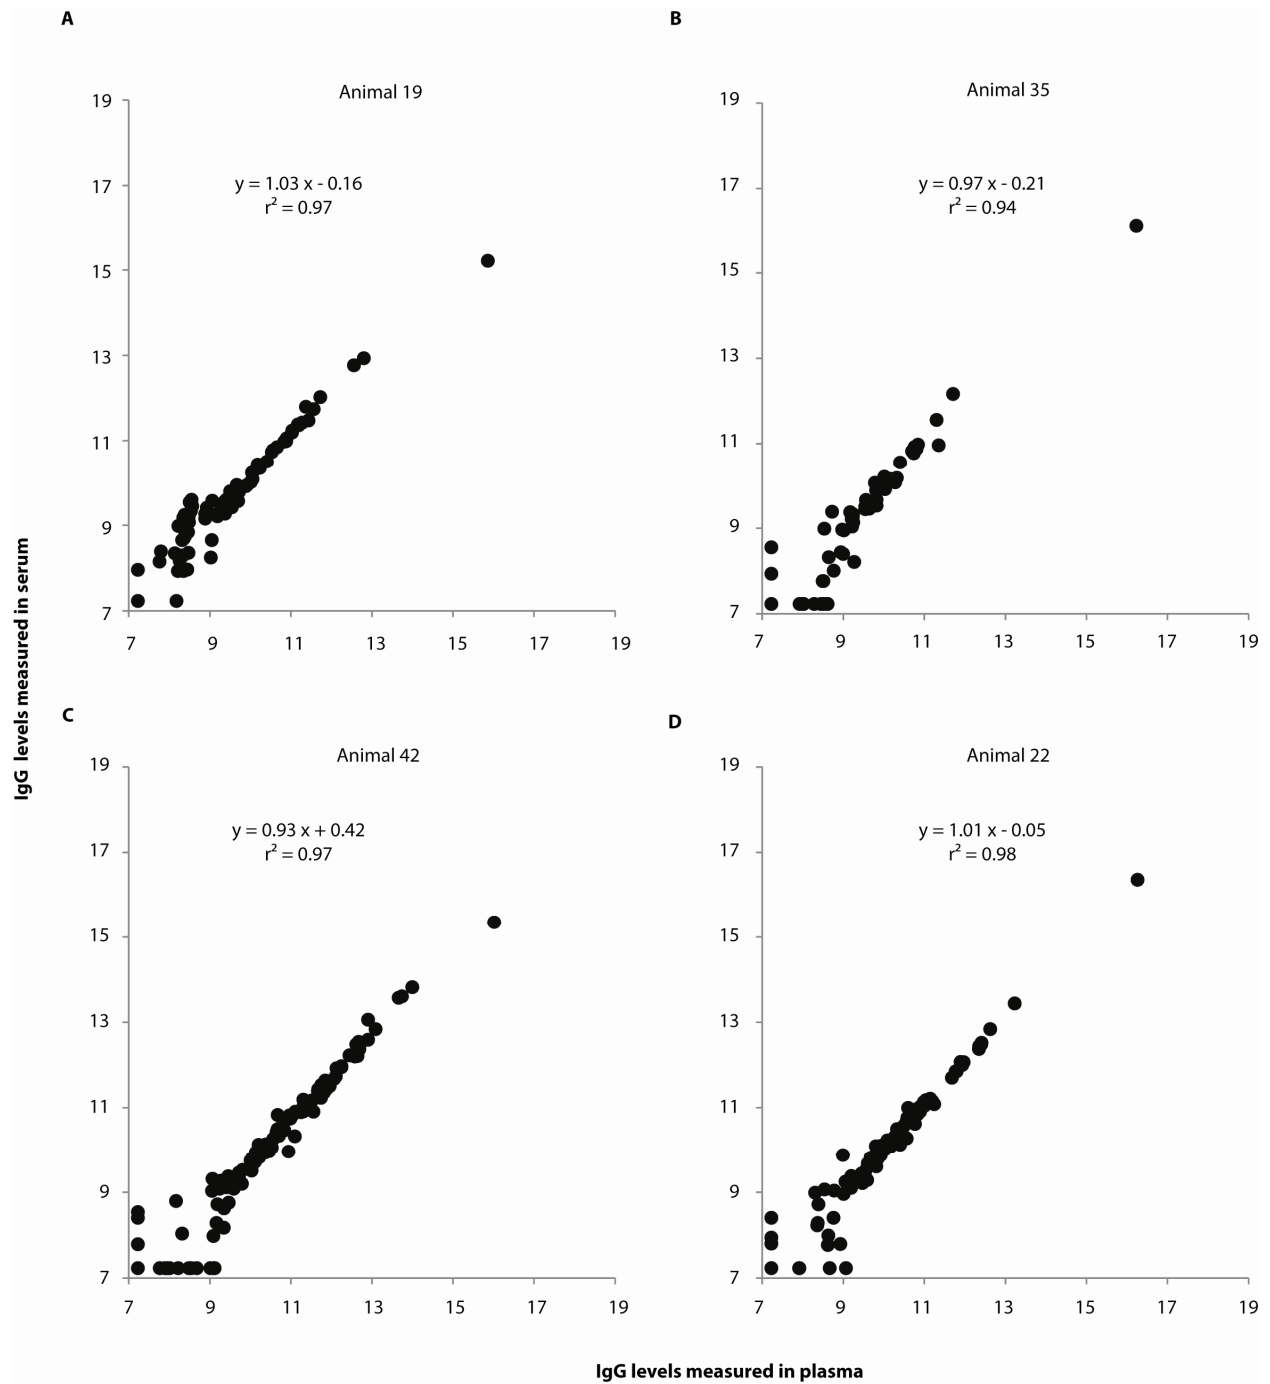

**Supplemental Figure S3. Levels of circulating anti-glycan IgG measured in plasma and serum.** Serum and plasma samples were obtained simultaneously from 4 macaques (A-D). For each animal, scatterplots compare the levels of IgG bound to each array component measured in plasma (x-axis) with the corresponding levels of IgG antibody measured in serum (y-axis).

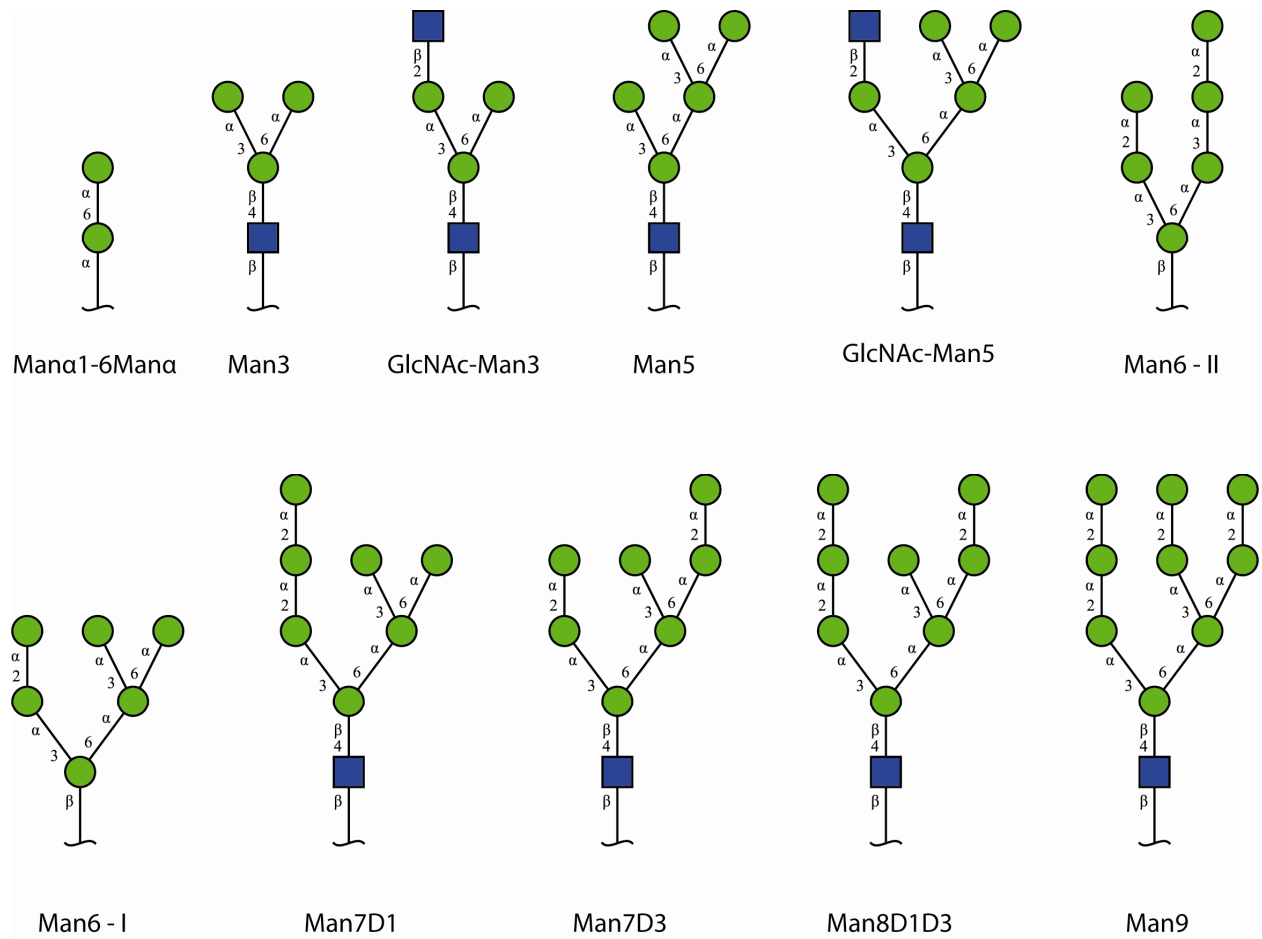

**Supplemental Figure S4. Array components related to the glycan shield of HIV.** The glycan microarray contained 11 components reported to be fragments of the glycan shield.

| Glycans                      | Isotype | Post-Vaccination |          | 4 Wks Post-Challenge |          | 22 Wks Post-Challenge |          |
|------------------------------|---------|------------------|----------|----------------------|----------|-----------------------|----------|
|                              |         | Increase         | Decrease | Increase             | Decrease | Increase              | Decrease |
| Man $\alpha$ 1-6Man $\alpha$ | IgM     | 10               | 1        | 2                    | 5        | 2                     | 14       |
|                              | IgG     | 1                | 0        | 0                    | 0        | 1                     | 5        |
| Man3                         | IgM     | 0                | 0        | 0                    | 0        | 0                     | 0        |
|                              | IgG     | 0                | 0        | 0                    | 0        | 0                     | 0        |
| GlcNAc-Man3                  | IgM     | 0                | 0        | 0                    | 0        | 0                     | 0        |
|                              | IgG     | 0                | 0        | 0                    | 0        | 0                     | 0        |
| Man5                         | IgM     | 0                | 0        | 0                    | 0        | 0                     | 0        |
|                              | IgG     | 0                | 0        | 0                    | 0        | 0                     | 0        |
| GlcNAc-Man5                  | IgM     | 0                | 0        | 0                    | 0        | 0                     | 0        |
|                              | IgG     | 0                | 0        | 0                    | 0        | 0                     | 0        |
| Man6 - I                     | IgM     | 0                | 0        | 0                    | 0        | 0                     | 0        |
|                              | IgG     | 0                | 0        | 0                    | 0        | 0                     | 0        |
| Man6 - II                    | IgM     | 3                | 1        | 1                    | 1        | 3                     | 1        |
|                              | IgG     | 0                | 0        | 0                    | 0        | 0                     | 0        |
| Man7D1                       | IgM     | 0                | 0        | 0                    | 0        | 0                     | 0        |
|                              | IgG     | 0                | 0        | 0                    | 0        | 0                     | 0        |
| Man7D3                       | IgM     | 0                | 0        | 0                    | 0        | 0                     | 0        |
|                              | IgG     | 0                | 0        | 0                    | 0        | 0                     | 0        |
| Man8D1D3                     | IgM     | 0                | 0        | 0                    | 0        | 0                     | 0        |
|                              | IgG     | 0                | 0        | 0                    | 0        | 0                     | 0        |
| Man9                         | IgM     | 0                | 0        | 0                    | 0        | 0                     | 0        |
|                              | IgG     | 0                | 0        | 0                    | 0        | 0                     | 0        |

**Supplementary Table S2. Changes in antibody levels for components of the glycan shield.**

Changes in antibodies for components of the glycan shield rarely occurred in any of the 38

macaques after vaccination with Ad5hr-SIV (wk 0 vs. wk 38) or following challenge with SIV (wk 38 vs. wk.46 & wk. 38 vs. week 64). The number of macaques that showed four-fold changes (increases  $\geq 300\%$  or decreases  $\leq 75\%$ ) in anti-glycan antibodies are summarized for each of the 11 array components shown in Fig. 5.



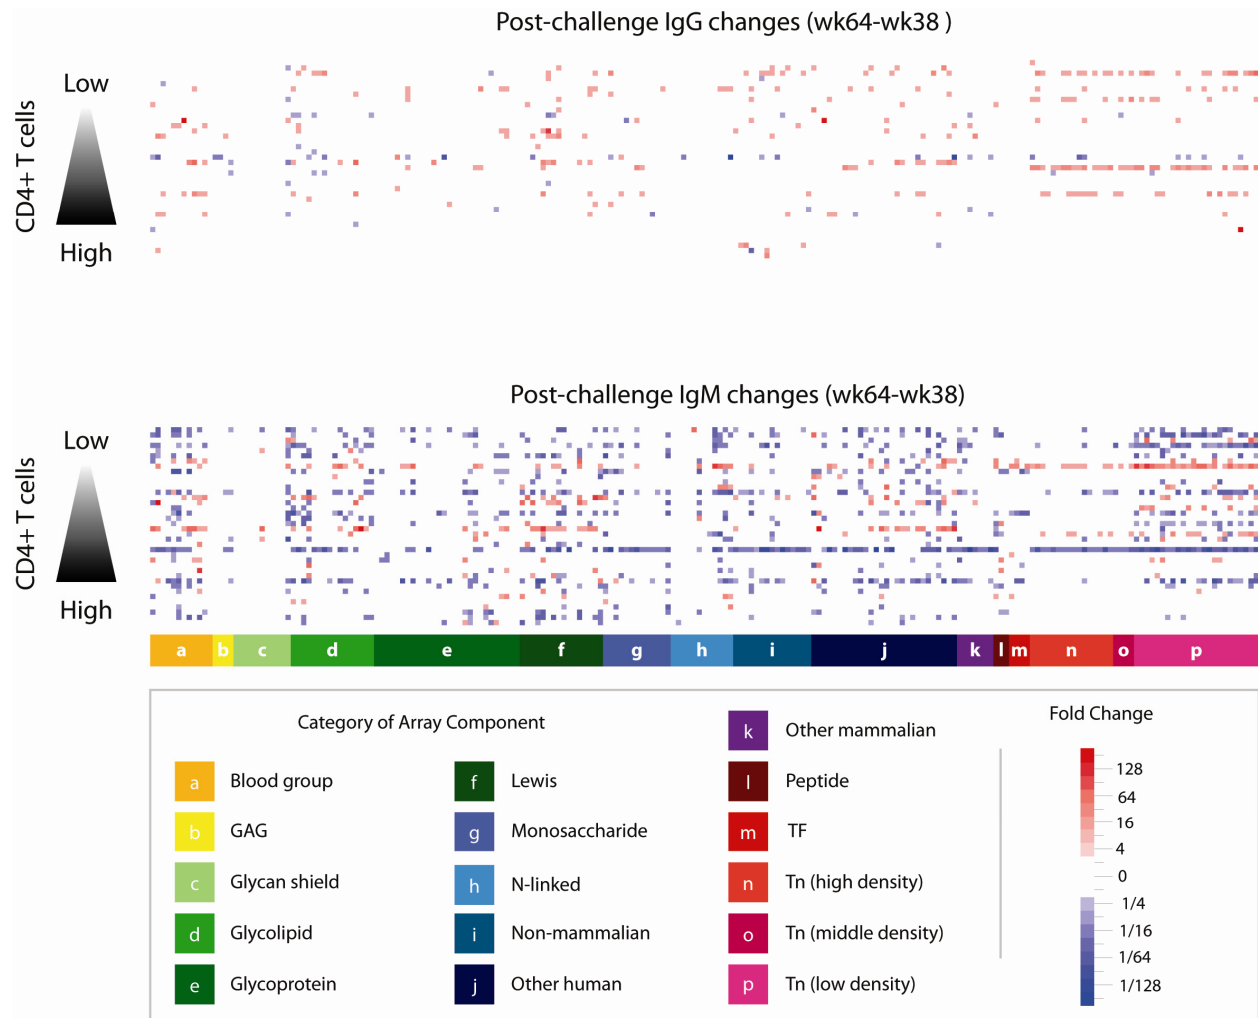

**Supplemental Figure S5. Later changes in anti-glycan antibody levels after SIV infection.** Post-infection changes in anti-glycan antibody levels were analyzed for overall week 64 (22 weeks after challenge). This heat map shows changes in circulating IgG (A) and IgM (B) anti-glycan antibodies that occurred after vaccinated macaques were challenged with SIV (wk 64 – wk 38). Rows correspond to individual macaques (n=38) sorted according to progression of SIV infection, as indicated by CD4+ T cell levels measured at week 64. Columns are glycans grouped by category. White indicates non-significant changes (<4x).
